# Supplementary material
Source: publisher figshare collection journal article supplement (https://plos.figshare.com/articles/dataset/_/8083982)
Supplement: Supplementary file 1 [file 1]

Archive with 7 entries (7 files):
- pone.0216608.s001.xlsx
- pone.0216608.s002.xlsx
- pone.0216608.s003.xlsx
- pone.0216608.s004.pdf
- pone.0216608.s005.pdf
- pone.0216608.s006.pdf
- pone.0216608.s007.pdf
