# Supplementary material
Source: publisher figshare collection journal article supplement (https://plos.figshare.com/articles/dataset/_/8083982)
Supplement: Supplementary file 1 [file 1 › pone.0216608.s001.xlsx]

## Sheet: ML
Biological Function	Genes	Alignment length	Substitution model for phylogenetic analyses
mitochondrial ATP synthase	atp6, atp9	905	GTR+Γ+I
cytochrome oxidase	cox1, cox2, cox3	2985	GTR+Γ+I
NADH synthase	nad1, nad2, nad3, nad4L, nad4L, nad5, nad6	7039	GTR+Γ+I
plastid ATP synthase	atpA, atpB, atpE, atpF, atpH	4047	GTR+Γ+I
cytochrome b6f complex	petA, petB, petG	1695	GTR+Γ+I
photosystem I	psaA, psaB, psaC, ycf3	5217	GTR+Γ+I
photosystem II	psbA, psbB, psbC, psbD, psbE, psbF, psbH, psbI, psbJ, psbK, psbL, psbN, psbT, psbZ, ycf12	6450	GTR+Γ+I
large subunit ribrosomal protein	rpl2, rpl5, rpl14, rpl16, rpl20, rpl36	2619	GTR+Γ+I
small subunit ribrosomal protein	rps2, rps3, rps4, rps7, rps8, rps11, rps12, rps14, rps18, rps19	7712	GTR+Γ+I

## Sheet: Bayesian
S1 Table. Alignment length and nucleotide substitution model used for phylogenetic analysis of concatenated sequences of each gene family.
Biological Function	Genes	Alignment length	Substitution model for phylogenetic analyses
mitochondrial ATP synthase	atp6, atp9	905	GTR+Γ+I
cytochrome oxidase	cox1, cox2, cox3	2985	GTR+Γ+I
NADH synthase	nad1, nad2, nad3, nad4L, nad4L, nad5, nad6	7039	GTR+Γ+I
plastid ATP synthase	atpA, atpB, atpE, atpF, atpH	4047	GTR+Γ+I
cytochrome b6f complex	petA, petB, petG	1695	GTR+Γ+I
photosystem I	psaA, psaB, psaC, ycf3	5217	GTR+Γ+I
photosystem II	psbA, psbB, psbC, psbD, psbE, psbF, psbH, psbI, psbJ, psbK, psbL, psbN, psbT, psbZ, ycf12	6450	GTR+Γ+I
large subunit ribrosomal protein	rpl2, rpl5, rpl14, rpl16, rpl20, rpl36	2619	GTR+Γ+I
small subunit ribrosomal protein	rps2, rps3, rps4, rps7, rps8, rps11, rps12, rps14, rps18, rps19	7712	GTR+Γ+I
