# Supplementary material
Source: publisher figshare collection journal article supplement (https://plos.figshare.com/articles/dataset/_/8083982)
Supplement: Supplementary file 1 [file 1 › pone.0216608.s002.xlsx]

## Sheet: ML nucleotide
Genes		Trimmed alignment
Mitochondrial genes	Alignment length	Alignment length	Substitution model for phylogenetic analyses
atp6	945	680	GTR+I+G
atp9	255	225	TIM1+G
cob	1531	1053	GTR+I+G
cox1	1782	1560	GTR+G
cox2	957	642	GTR+I+G
cox3	1053	783	GTR+I+G
nad1	1038	972	GTR+G
nad2	2403	1533	GTR+I+G
nad3	405	351	TIM3+I+G
nad4L	408	303	GTR+G
nad4	1752	1443	GTR+I+G
nad5	2271	1983	GTR+I+G
nad6	903	454	GTR+G
		Trimmed alignment
Plastid genes genes		Alignment length	Substitution model for phylogenetic analyses
atpA	1665	1518	GTR+I+G
atpB	1575	1443	GTR+I+G
atpE	435	396	GTR+G
atpF	576	444	GTR+I+G
atpH	303	246	TIM1+I+G
clpP	1698	1638	TIM3+G
petA	1041	933	GTR+I+G
petB	645	648	TIM3+I+G
petG	234	114	TIM3+G
psaA	2277	2253	GTR+I+G
psaB	2238	2202	GTR+I+G
psaC	291	246	TIM3+I+G
psbA	1089	1062	GTR+I+G
psbB	1527	1326	GTR+I+G
psbC	1464	1386	GTR+I+G
psbD	1062	1059	GTR+I+G
psbE	327	249	TIM3+I+G
psbF	153	126	TrN+I+G
psbH	297	240	GTR+I+G
psbI	114	108	GTR+G
psbJ	231	126	TIM3+G
psbK	189	132	GTR+I+G
psbL	114	117	GTR+I+G
psbN	132	129	TVM+I+G
psbT	120	99	TIM3+I+G
psbZ	195	189	GTR+G
rbcL	1455	1425	GTR+I+G
rpl2	843	828	TIM3+I+G
rpl5	570	555	GTR+G
rpl14	366	363	TIM3+I+G
rpl16	432	414	TIM3+I+G
rpl20	357	345	TVM+I+G
rpl36	114	114	TVM+I+G
rps2	2937	2523	GTR+I+G
rps3	2223	2055	TVM+I+G
rps4	813	765	TIM3+I+G
rps7	558	471	GTR+I+G
rps8	471	387	TPM3uf+I+G
rps11	396	393	TIM3+G
rps12	390	372	GTR+I+G
rps14	300	303	TIM3+I+G
rps18	555	161	TIM3+G
rps19	339	282	TIM3+G
ycf3	534	516	TIM3+I+G
ycf12	111	102	GTR+G
		Trimmed alignment
ribosomal rRNA genes	Alignment length	Alignment length	Substitution model for phylogenetic analyses
rrnL and rrs	5687	4222	GTR+Γ+I

## Sheet: MrBayes nucleotide
S2 Table. Alignment length and nucleotide substitution model used for phylogenetic analysis of sequence of each gene.
Genes		Trimmed alignment
Mitochondrial genes	Alignment length	Alignment length	Substitution model for phylogenetic analyses
atp6	945	680	GTR+I+G
atp9	255	225	TIM1+G
cob	1531	1053	GTR+I+G
cox1	1782	1560	GTR+G
cox2	957	642	GTR+I+G
cox3	1053	783	GTR+I+G
nad1	1038	972	GTR+G
nad2	2403	1533	GTR+I+G
nad3	405	351	TIM3+I+G
nad4L	408	303	GTR+G
nad4	1752	1443	GTR+I+G
nad5	2271	1983	GTR+I+G
nad6	903	454	GTR+G
		Trimmed alignment
Plastid genes genes		Alignment length	Substitution model for phylogenetic analyses
atpA	1665	1518	GTR+I+G
atpB	1575	1443	GTR+I+G
atpE	435	396	GTR+G
atpF	576	444	GTR+I+G
atpH	303	246	TIM1+I+G
clpP	1698	1638	TIM3+G
petA	1041	933	GTR+I+G
petB	645	648	TIM3+I+G
petG	234	114	TIM3+G
psaA	2277	2253	GTR+I+G
psaB	2238	2202	GTR+I+G
psaC	291	246	TIM3+I+G
psbA	1089	1062	GTR+I+G
psbB	1527	1326	GTR+I+G
psbC	1464	1386	GTR+I+G
psbD	1062	1059	GTR+I+G
psbE	327	249	TIM3+I+G
psbF	153	126	TrN+I+G
psbH	297	240	GTR+I+G
psbI	114	108	GTR+G
psbJ	231	126	TIM3+G
psbK	189	132	GTR+I+G
psbL	114	117	GTR+I+G
psbN	132	129	TVM+I+G
psbT	120	99	TIM3+I+G
psbZ	195	189	GTR+G
rbcL	1455	1425	GTR+I+G
rpl2	843	828	TIM3+I+G
rpl5	570	555	GTR+G
rpl14	366	363	TIM3+I+G
rpl16	432	414	TIM3+I+G
rpl20	357	345	TVM+I+G
rpl36	114	114	TVM+I+G
rps2	2937	2523	GTR+I+G
rps3	2223	2055	TVM+I+G
rps4	813	765	TIM3+I+G
rps7	558	471	GTR+I+G
rps8	471	387	TPM3uf+I+G
rps11	396	393	TIM3+G
rps12	390	372	GTR+I+G
rps14	300	303	TIM3+I+G
rps18	555	161	TIM3+G
rps19	339	282	TIM3+G
ycf3	534	516	TIM3+I+G
ycf12	111	102	GTR+G
		Trimmed alignment
ribosomal rRNA genes	Alignment length	Alignment length	Substitution model for phylogenetic analyses
rrnL and rrs	5687	4222	GTR+Γ+I
