# Supplementary material
Source: publisher figshare collection journal article supplement (https://plos.figshare.com/articles/dataset/_/8083982)
Supplement: Supplementary file 1 [file 1 › pone.0216608.s003.xlsx]

## Sheet: Sheet1
S3 Table. Monophyly of known clades resolved from phylogenetic estimations. Bootstrap value cut-off is ≥ 80 in Maximum Likelihood framework or ≥ 0.8 in Bayesian Inference.
Genes	Streptophyte algae	Chlorophyceae	Trebouxiophyceae	Ulvophyceae
atp6	no	yes	no	no
atp9	no	yes	no	no
atpA	yes	yes	no	yes
atpB	yes	yes	no	no
atpE	no	yes	no	yes
atpF	no	yes	no	no
atpH	no	no	no	yes
clpP	no	yes	no	no
cob	no	no	no	no
cox1	no	no	no	no
cox2	no	yes	no	no
cox3	no	yes	no	no
nad1	no	yes	no	no
nad2	no	yes	yes	no
nad3	no	yes	no	no
nad4	no	yes	no	no
nad4L	no	yes	no	no
nad5	no	yes	no	yes
nad6	no	yes	no	yes
petA	yes	yes	no	no
petB	no	no	no	no
petG	no	no	no	no
psaA	yes	yes	no	no
psaB	yes	yes	no	no
psaC	no	yes	no	no
psbA	no	no	no	no
psbB	yes	yes	no	no
psbC	yes	yes	no	yes
psbD	yes	yes	no	yes
psbE	yes	yes	no	no
psbF	no	no	no	no
psbH	no	yes	no	no
psbI	no	no	no	no
psbJ	no	no	no	no
psbK	no	no	no	no
psbL	no	no	no	no
psbN	no	yes	no	no
psbT	no	no	no	no
psbZ	no	yes	no	no
rbcL	yes	no	no	no
rpl2	yes	yes	no	no
rpl5	yes	yes	no	no
rpl14	no	yes	no	yes
rpl16	no	yes	no	no
rpl20	no	yes	no	no
rpl36	no	no	no	no
rps2	yes	yes	no	no
rps3	no	yes	no	no
rps4	no	yes	no	no
rps7	no	yes	no	no
rps8	no	yes	no	no
rps11	no	yes	no	no
rps12	yes	yes	no	no
rps14	no	yes	no	no
rps18	no	yes	no	no
rps19	no	yes	no	no
ycf12	no	no	no	no
ycf3	no	no	no	yes
Mitochondrial tree	yes	yes	yes	no
Plastid tree	yes	yes	no	no
Combined tree	yes	yes	yes	no
Mitochondrial ATP synthase	no	yes	no	no
Cytochrome oxidase	yes	yes	no	no
NADH synthase	no	yes	no	yes
Plastid ATP synthase	yes	yes	yes	yes
Cytochrome b6f complex	yes	yes	no	no
Photosystem I	yes	yes	no	no
Photosystem II	yes	yes	no	yes
Large subunit ribrosomal protein	yes	yes	no	no
Small subunit ribrosomal protein	yes	yes	no	yes
