# Supplementary material
Source: publisher figshare collection journal article supplement (https://plos.figshare.com/articles/dataset/_/8083982)
Supplement: Supplementary file 1 [file 1 › pone.0216608.s004.pdf]

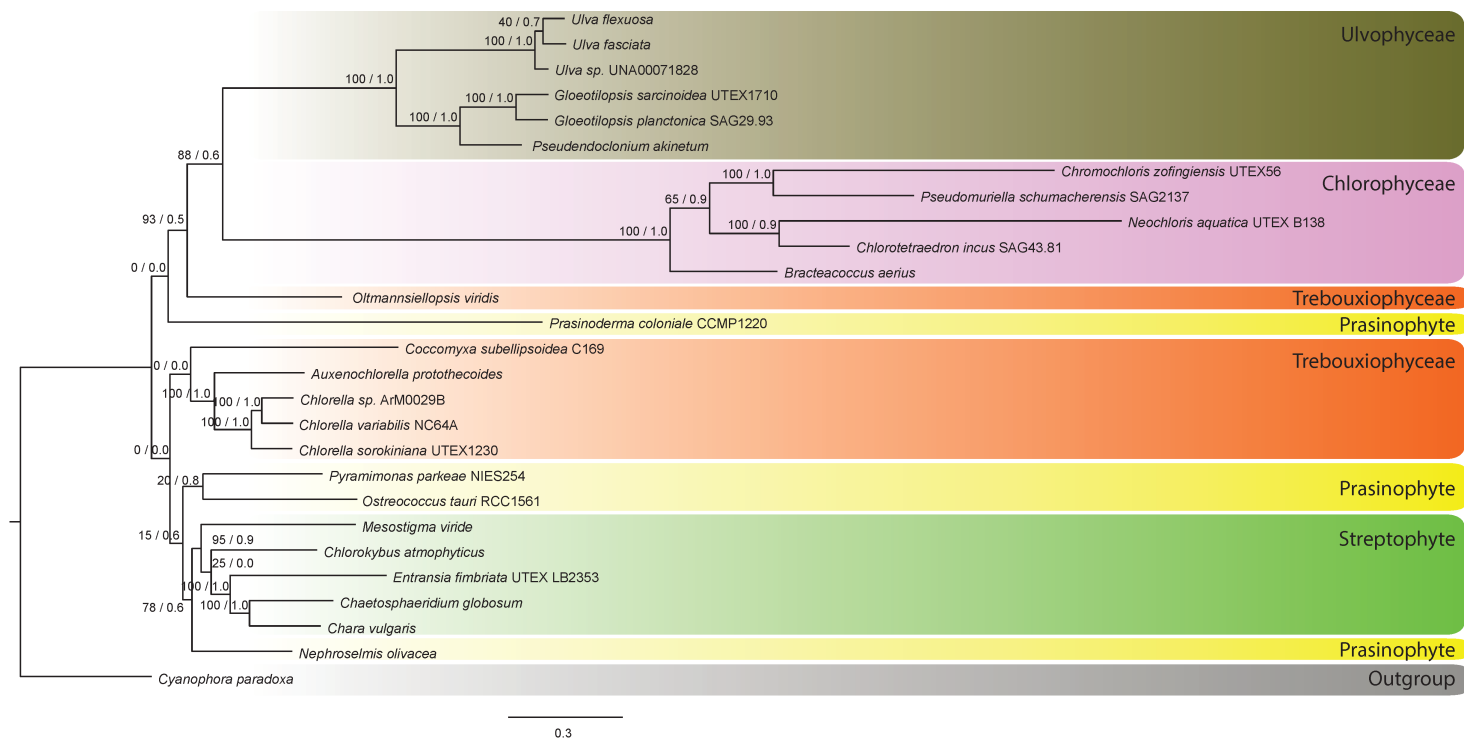

**S1 Fig. A. Maximum-Likelihood tree inferred from 13 mitochondrial protein-coding sequences of algal taxa in Table 1 using a GTR+ $\Gamma$ +I nucleotide substitution model. Bootstrap value from ML and posterior probability from Bayesian inference are shown at the node. The scale bar represents the estimated number of nucleotide substitution per site.**

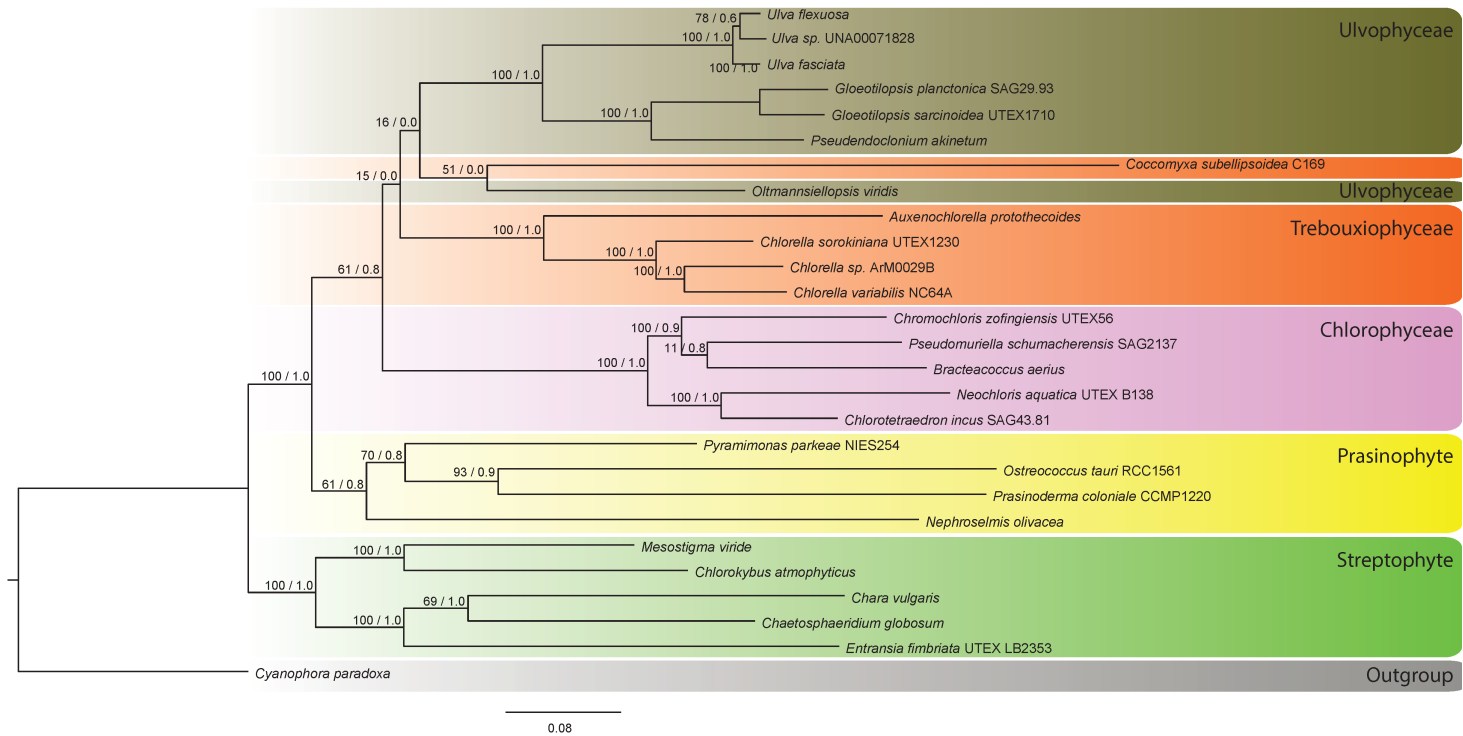

**S1 Fig. B. Maximum-Likelihood tree inferred from 45 plastid protein-coding sequences of algal taxa in Table 1 using a GTR+ $\Gamma$ +I nucleotide substitution model. Bootstrap value from ML and posterior probability from Bayesian inference are shown at the node. The scale bar represents the estimated number of nucleotide substitution per site.**
