# Supplementary material
Source: publisher figshare collection journal article supplement (https://plos.figshare.com/articles/dataset/_/8083982)
Supplement: Supplementary file 1 [file 1 › pone.0216608.s005.pdf]

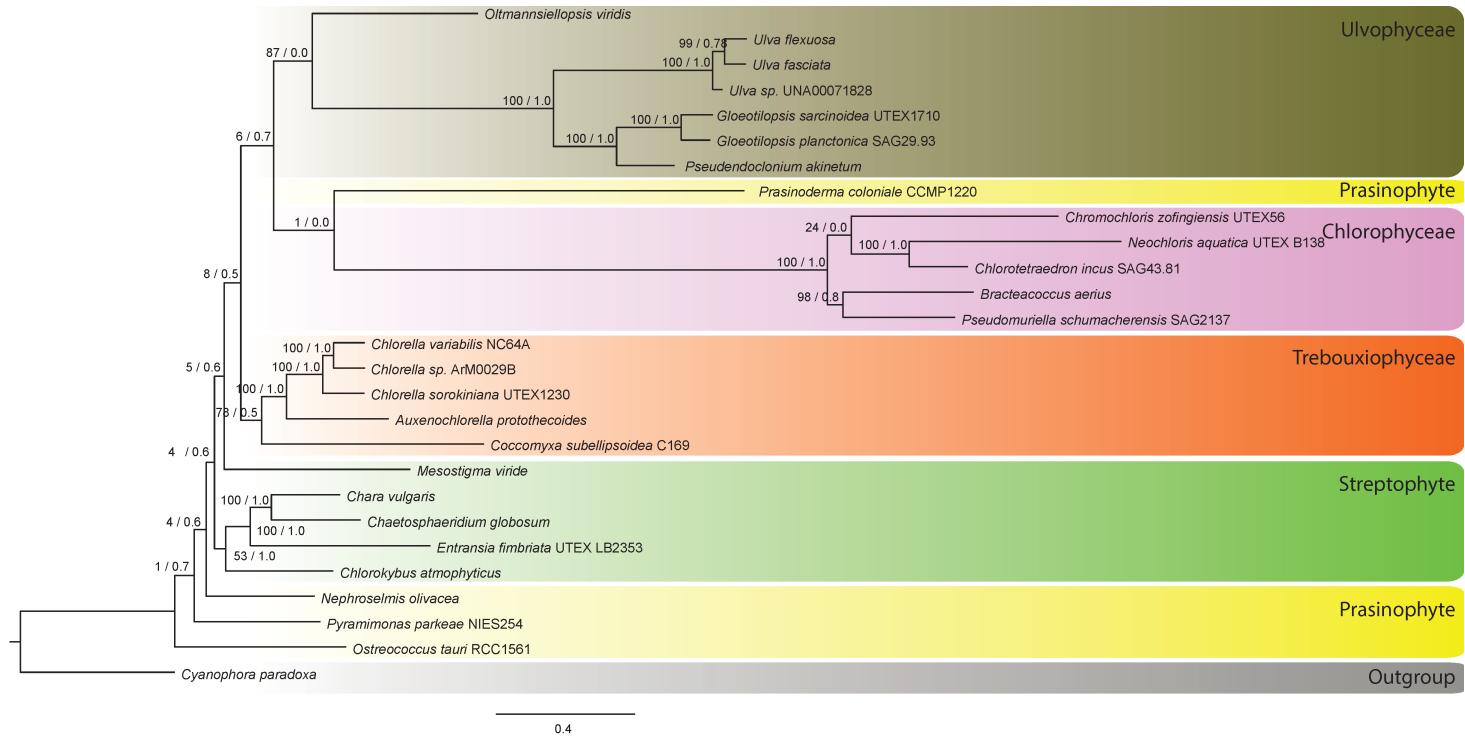

**S2 Fig. A. Maximum-Likelihood tree inferred from mitochondrial protein-coding sequences encode for NADH dehydrogenase subunits of algal taxa in Table 1 using a GTR+Γ+I nucleotide substitution model. Bootstrap value from ML and posterior probability from Bayesian inference are shown at the node. The scale bar represents the estimated number of nucleotide substitution per site.**

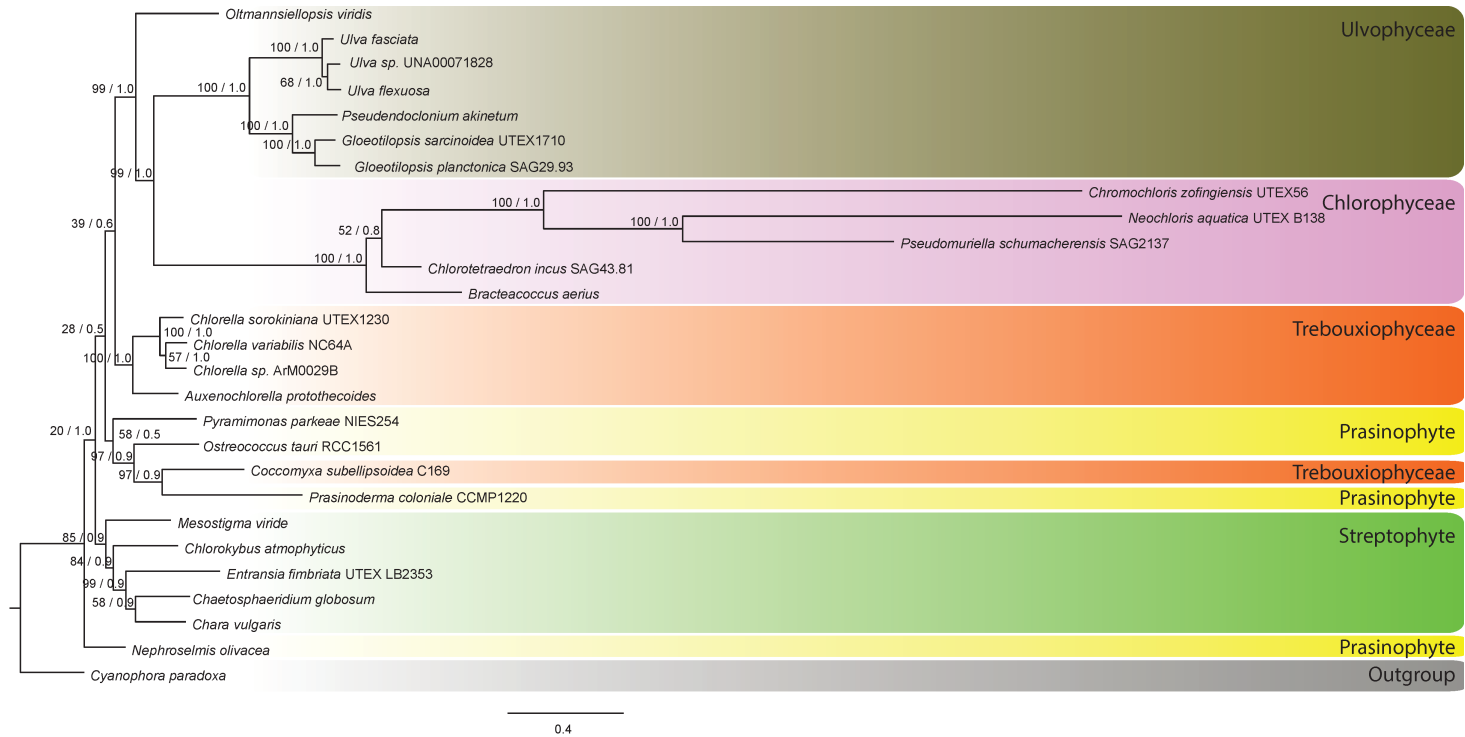

**S2 Fig. B. Maximum-Likelihood tree inferred from mitochondrial protein-coding sequences encode for cytochrome c oxidase (complex IV) subunits of algal taxa in Table 1 using a GTR+ $\Gamma$ +I nucleotide substitution model. Bootstrap value from ML and posterior probability from Bayesian inference are shown at the node. The scale bar represents the estimated number of nucleotide substitution per site.**

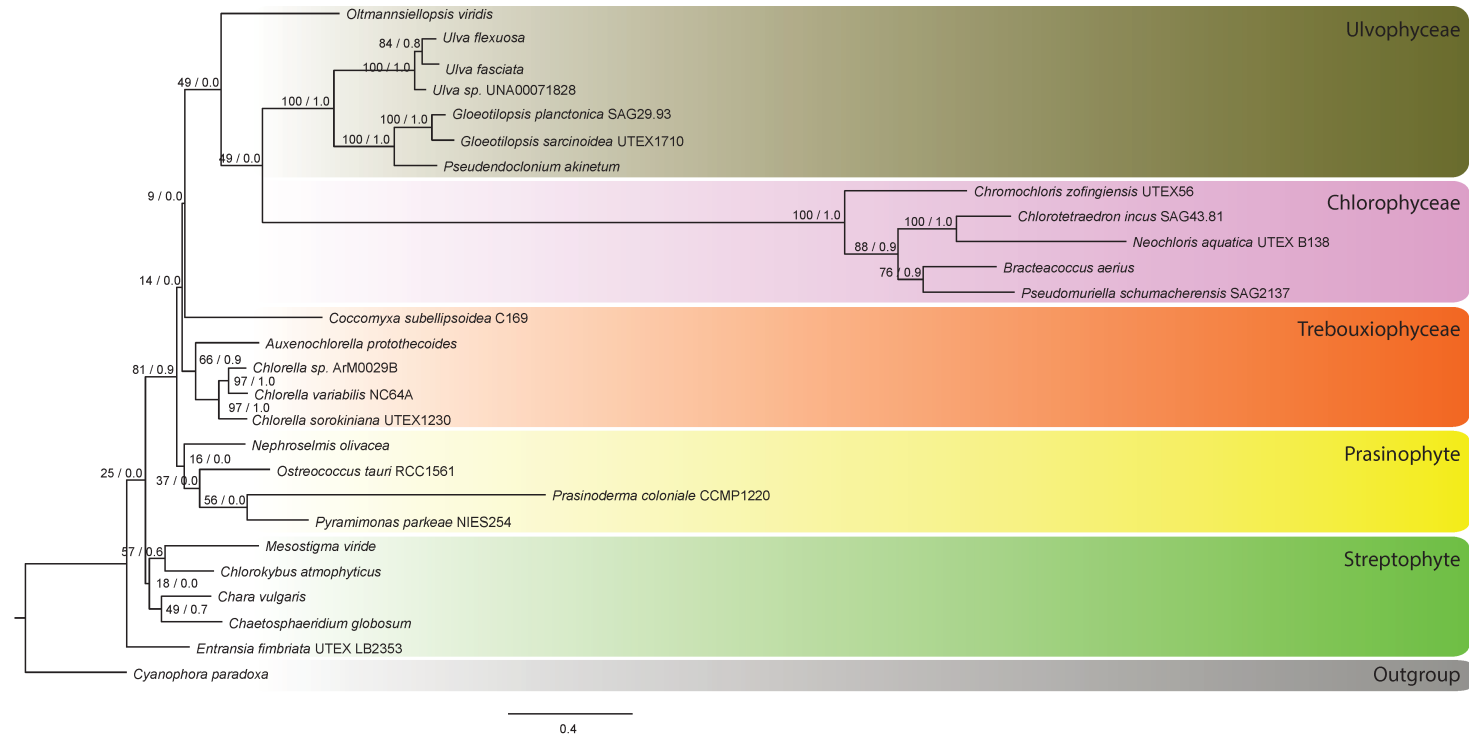

**S2 Fig. C. Maximum-Likelihood tree inferred from mitochondrial protein-coding sequences encode for ATP synthase (complex V) subunits of algal taxa in Table 1 using a GTR+ $\Gamma$ +I nucleotide substitution model. Bootstrap value from ML and posterior probability from Bayesian inference are shown at the node. The scale bar represents the estimated number of nucleotide substitution per site.**

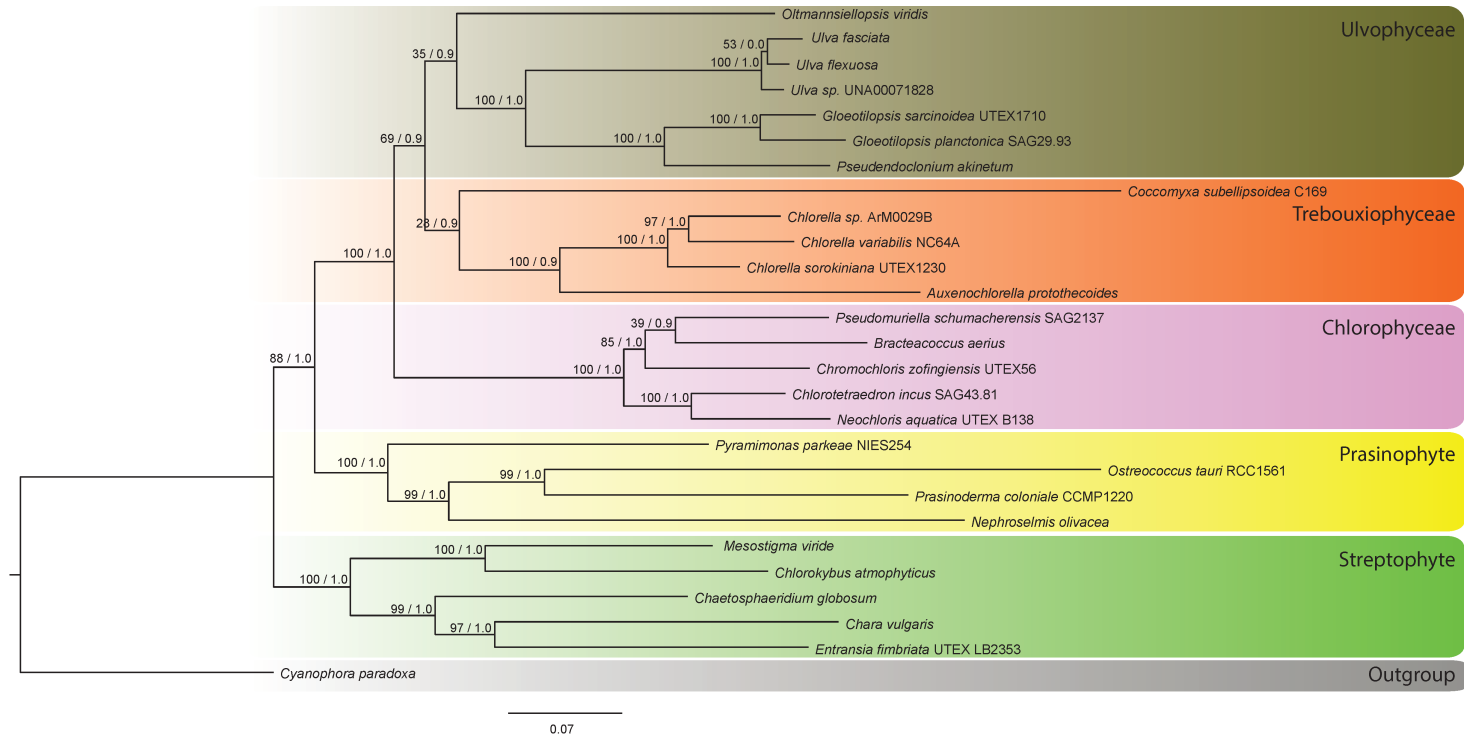

**S2 Fig. D. Maximum-Likelihood tree inferred from plastid protein-coding sequences encode for ATP synthase subunits of algal taxa in Table 1 using a GTR+ $\Gamma$ +I nucleotide substitution model.** Bootstrap value from ML and posterior probability from Bayesian inference are shown at the node. The scale bar represents the estimated number of nucleotide substitution per site.

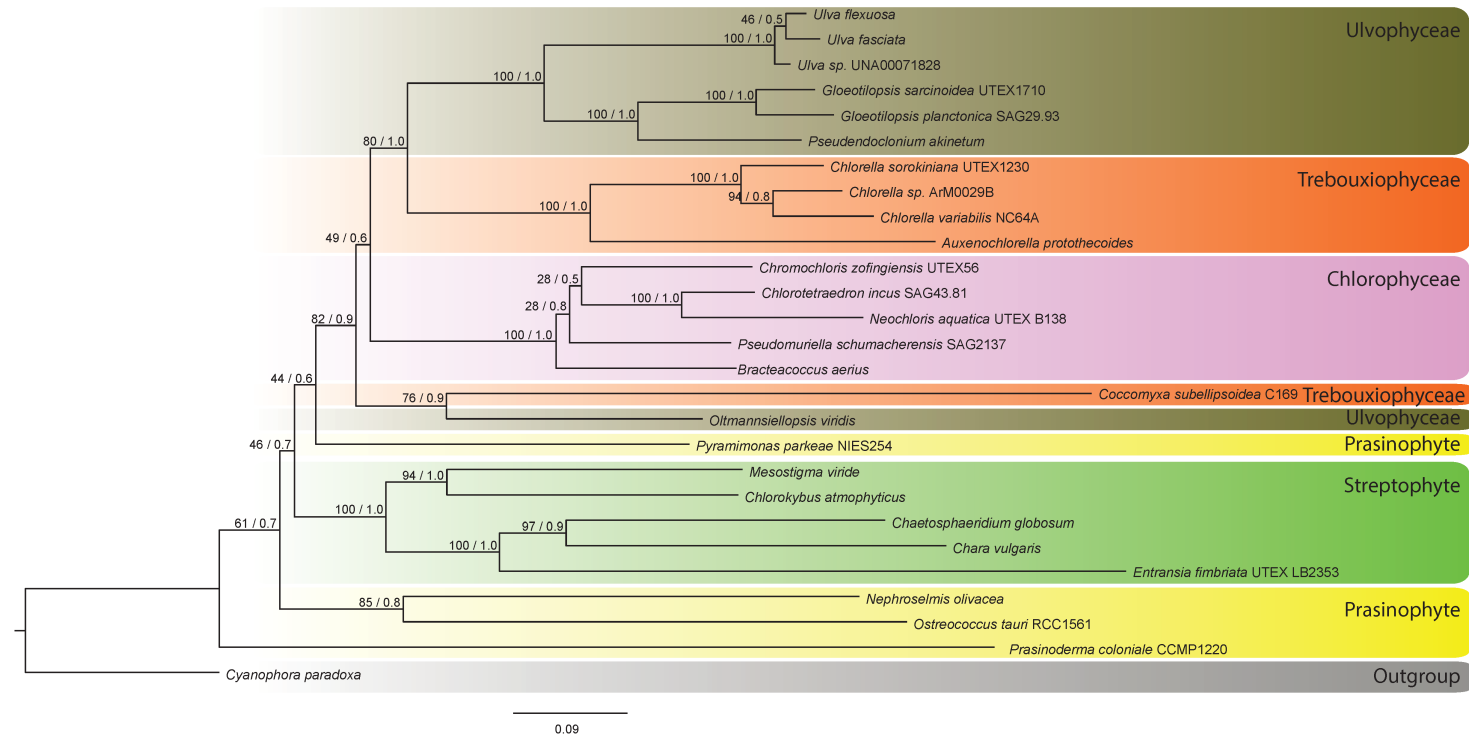

**S2 Fig. E.** Maximum-Likelihood tree inferred from plastid protein-coding sequences encode for ribosomal protein L of algal taxa in Table 1 using a GTR+ $\Gamma$ +I nucleotide substitution model. Bootstrap value from ML and posterior probability from Bayesian inference are shown at the node. The scale bar represents the estimated number of nucleotide substitution per site.

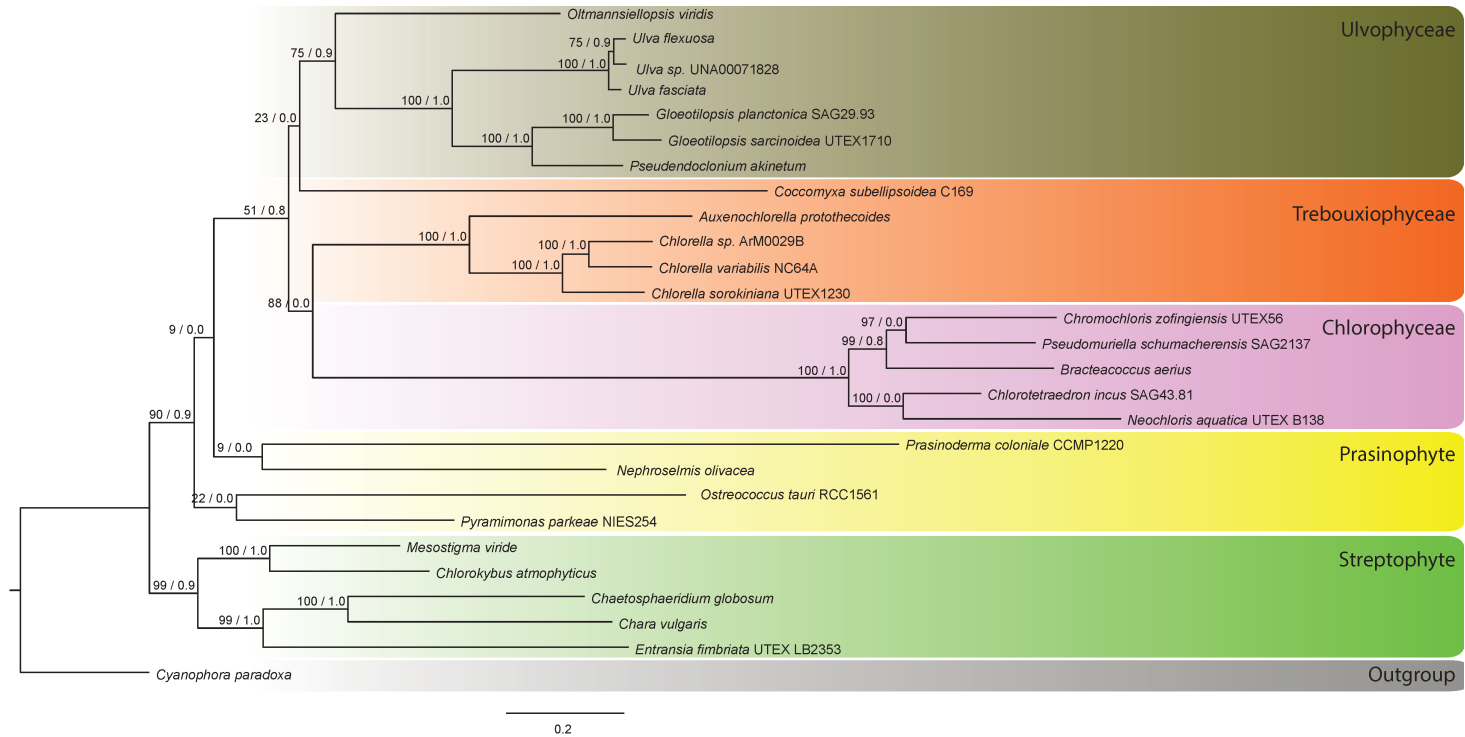

**S2 Fig. F. Maximum-Likelihood tree inferred from plastid protein-coding sequences encode for ribosomal protein S of algal taxa in Table 1 using a GTR+ $\Gamma$ +I nucleotide substitution model.** Bootstrap value from ML and posterior probability from Bayesian inference are shown at the node. The scale bar represents the estimated number of nucleotide substitution per site.

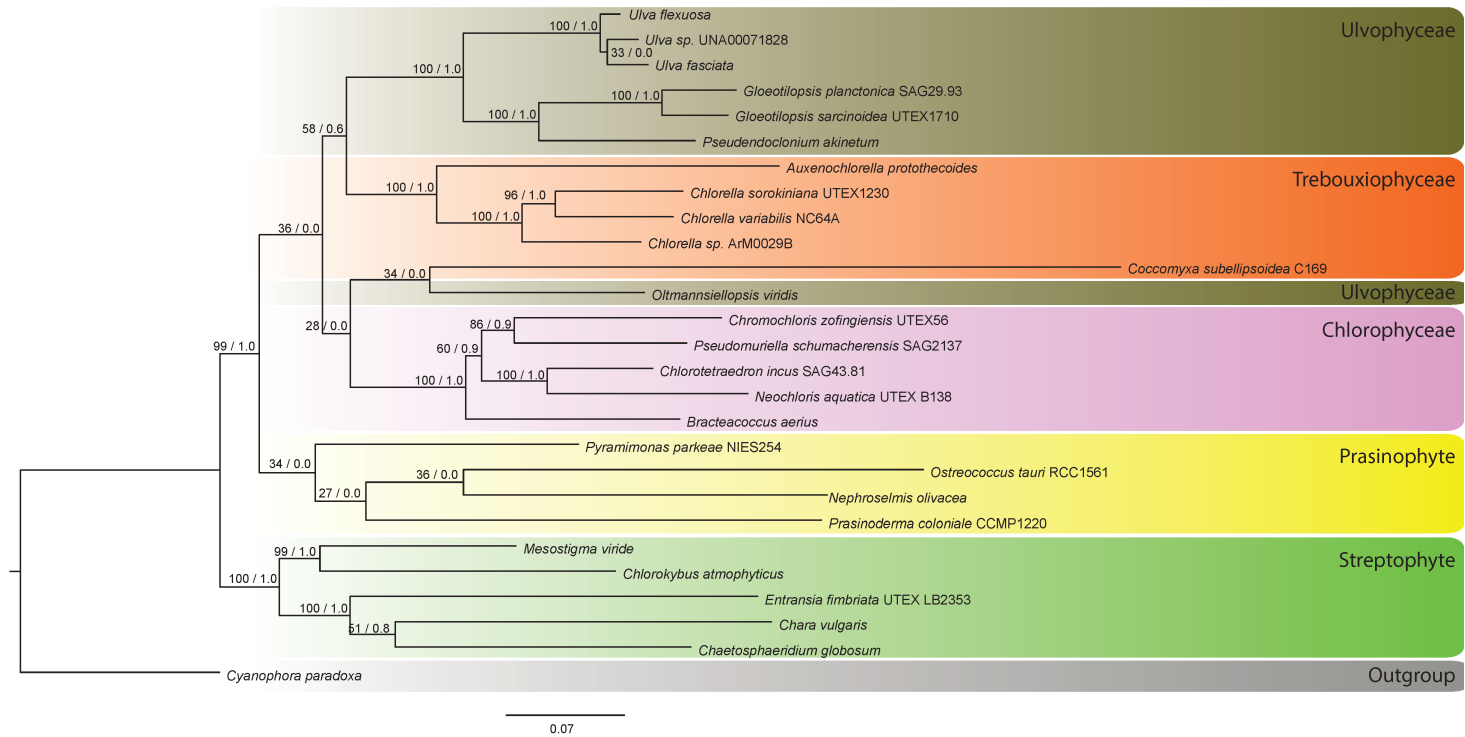

**S2 Fig. G. Maximum-Likelihood tree inferred from plastid protein-coding sequences encode for PSI subunits of algal taxa in Table 1 using a GTR+ $\Gamma$ +I nucleotide substitution model.** Bootstrap value from ML and posterior probability from Bayesian inference are shown at the node. The scale bar represents the estimated number of nucleotide substitution per site.

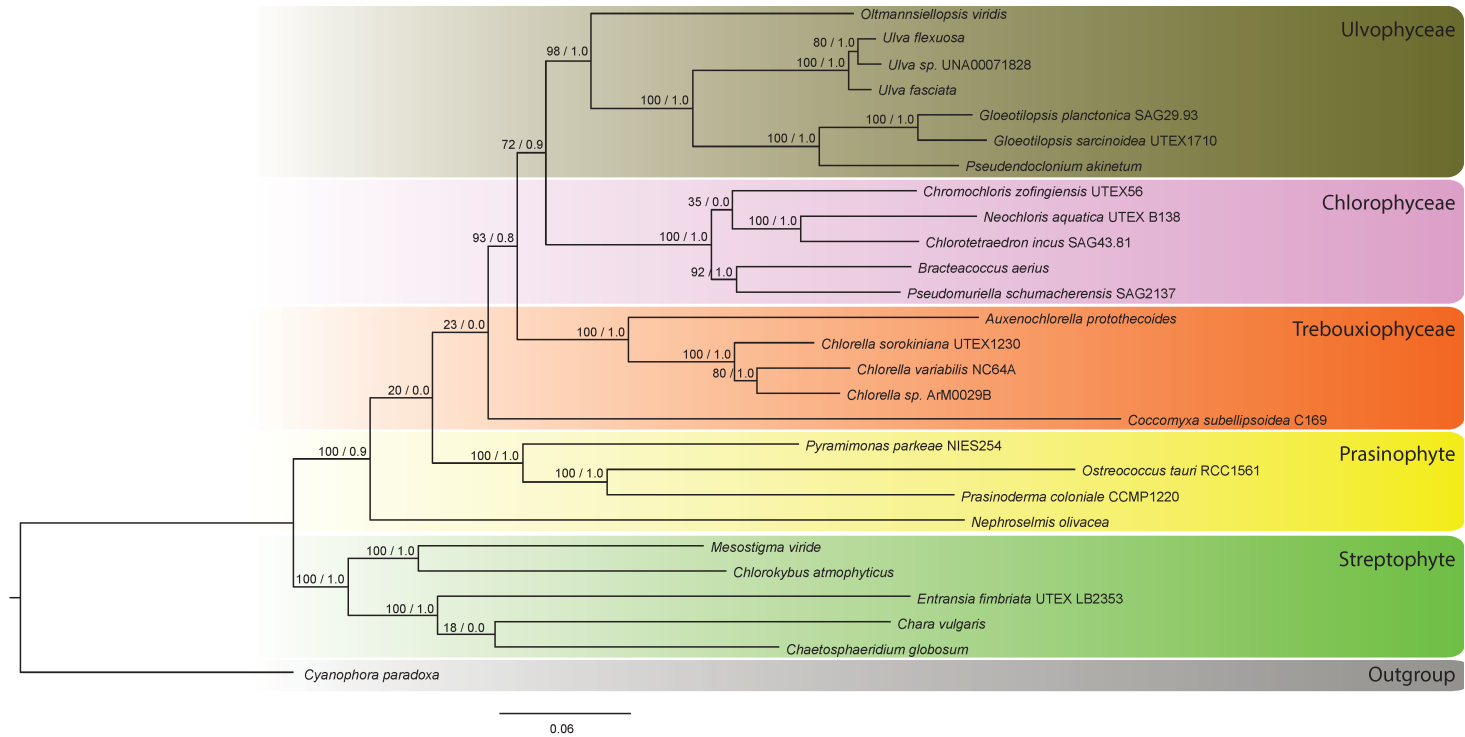

**S2 Fig. H. Maximum-Likelihood tree inferred from plastid protein-coding sequences encode for PSII subunits of algal taxa in Table 1 using a GTR+ $\Gamma$ +I nucleotide substitution model. Bootstrap value from ML and posterior probability from Bayesian inference are shown at the node. The scale bar represents the estimated number of nucleotide substitution per site.**

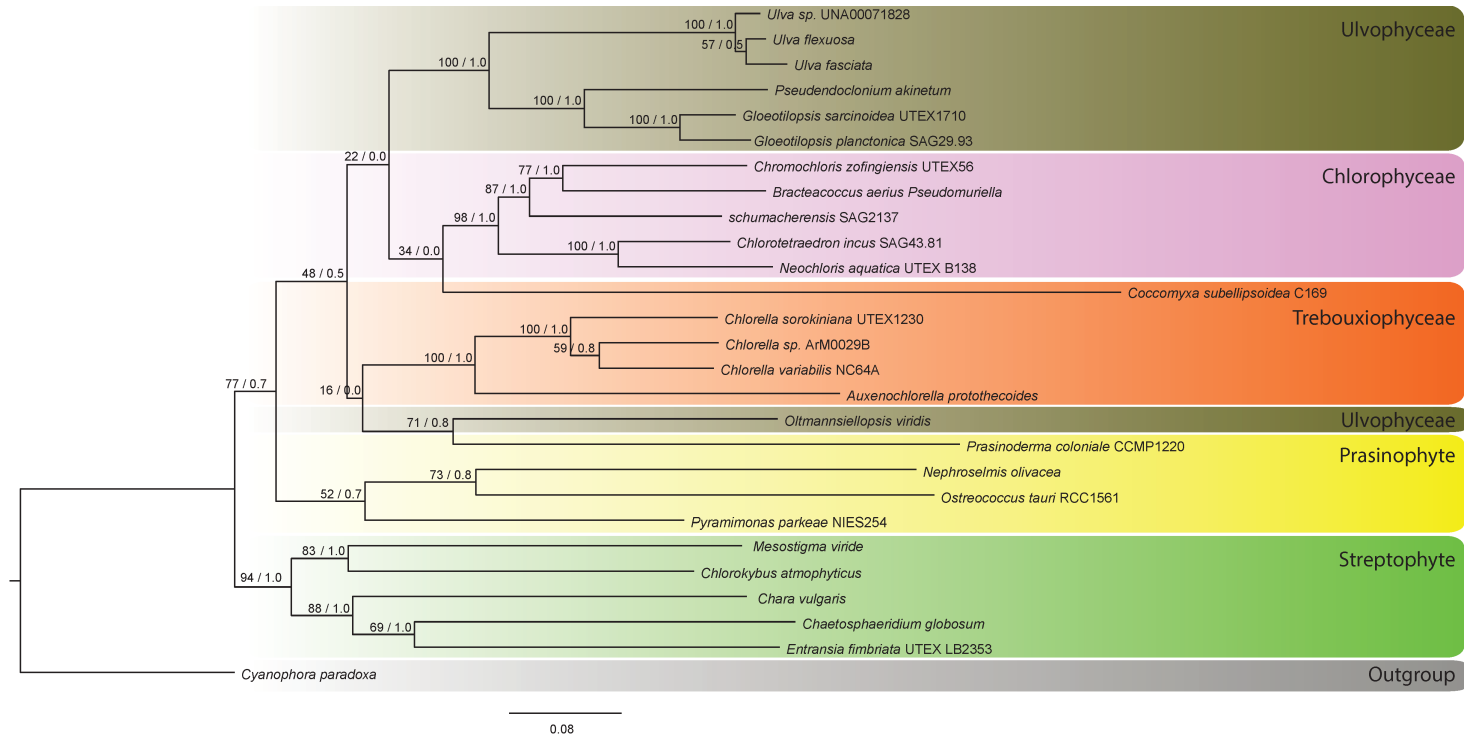

**S2 Fig. I.** Maximum-Likelihood tree inferred from plastid protein-coding sequences encode for cytochrome b6f complex of algal taxa in Table 1 using a GTR+ $\Gamma$ +I nucleotide substitution model. Bootstrap value from ML and posterior probability from Bayesian inference are shown at the node. The scale bar represents the estimated number of nucleotide substitution per site.
